# Supplementary material for: Analysis of rapid culture of high-efficiency nitrifying bacteria and immobilized filler application for the treatment of municipal wastewater
Source: Royal Society of Chemistry journal article supplement (doi:10.1039/d0ra01498b), 2020-01-01
Supplement: d0ra01498b1.xlsx [file d0ra01498b1.xlsx]

## Sheet: Sheet1
Figure2					Figure3								Figure4					Figure5										Figure6
Day	Influent ammonia	Effluent ammonia	Ammonia oxidation rate		Day	Influent nitrite	Effluent nitrite	Influent nitrate	Effluent nitrate	Nitrate production ratio	FNA		Day	MLSS	MLSS growth rate	Specific ammonia oxidation activity		Day	Influent ammonia	Effluent ammonia	Influent nitrite	Effluent nitrite	Influent nitrate	Effluent nitrate	Nitrite accumulation ratio	Ammonia oxidation rate		Day	Influent ammonia	Effluent ammonia	Ammonia removal ratio	Influent COD	Effluent COD	COD removal rate
1	47.3988	2.22385	11.2937		1	0.3912	0.4401	1.3564	70.2356	17.2198	0.000132863		1	5580	-15.1613	2.02397		1	49.9241	44.8735	0.1793	4.9226	0.3944	13.67	26.324	5.05062		1	52.4495	0.8209	98.4349
2	80.7891	15.6922	16.2742		2	0.2934	0.4238	3.2804	76.7772	18.3742	0.000127942		2	4734	-5.87241	3.43773		1.5	51.8883	45.4347	0.5053	4.6944	2.7032	13.2852	28.3601	6.45357		2	49.9241	0.25972	99.4798
3	127.907	31.1246	24.1957		3	0.0652	1.1899	2.8956	96.7868	23.4728	0.000359222		3	4456	-1.84022	5.42991		2	51.3271	44.0318	0.4075	5.8843	0.9716	12.3232	32.545	7.29534		3	51.3271	0	100
4	137.447	14.2892	30.7895		4	0.5379	3.0318	3.8576	120.26	29.1005	0.000915279		4	4374	-2.37769	7.03922		4	49.0824	33.9305	0.7987	11.3122	2.7032	16.9408	42.4769	15.1519		4	49.0824	0	100
5	188.515	47.96	35.1387		5	0.2771	3.2437	1.9336	128.533	31.6498	0.00097925		5	4270	-5.40984	8.2292		5	50.2047	31.1246	0.3097	8.6553	2.3184	14.8244	40.0238	19.0801		5	49.363	0	100
6	202.544	32.8082	42.434		6	0.7987	2.8362	0.9716	147.003	36.5079	0.000856229		6	4039	-0.965586	10.5159		6	53.0106	23.8293	0.3912	15.1753	1.9336	21.5584	42.9659	29.1814		6	50.2047	0	100
7	214.89	36.1752	44.6787		7	0.3586	3.2437	2.7032	170.091	41.847	0.00097925		7	4000	-6.75	11.1697		7	50.2047	12.0445	0.2771	23.472	1.9336	29.4468	45.742	38.1602		7	49.0824	0	100
8	207.595	15.6922	47.9757		8	0.1141	1.8419	3.8576	167.782	40.9812	0.000556057		8	3730	-4.82574	12.8621		8	97.6244	50.7659	1.1573	22.4125	2.5108	26.9456	46.5205	46.8585		8	51.6077	0	100
9	249.621	50.2047	49.854		9	0.6357	1.3203	1.9336	169.129	41.7989	0.000398589		9	3550	-1.97183	14.0434		9	99.5886	47.1183	0.7335	25.102	2.3184	28.6772	48.0382	52.4703		9	40.1035	4.18798	89.5571	142.5	128.52	13.98
10	263.65	28.8799	58.6926		10	0.3749	0.7335	2.7032	186.06	45.8393	0.000221439		10	3480	-8.04598	16.8657		10	100.711	40.1035	0.6683	36.4305	1.9336	34.2568	52.5255	60.6074		10	37.2976	3.6268	90.276	161.27	146.91	14.36
11	265.053	2.22385	65.7073		11	0.3097	1.4996	3.2804	211.842	52.1404	0.000452719		11	3200	-6.9375	20.5335		11	96.7827	31.6858	0.4564	40.8315	0.7792	31.1784	57.0477	65.0969		11	39.5423	2.78503	92.9568	151.82	134.46	17.36
12	333.798	17.0951	79.1757		12	0.5542	1.956	4.2424	257.248	63.2515	0.000590503		12	2978	-4.46608	26.5869		12	101.833	34.4917	0.1141	44.336	2.3184	32.5252	59.4151	67.3416		12	36.7364	1.38208	96.2378	144.4	128.26	16.14
13	389.916	45.1541	86.1904		13	0.4564	32.8934	1.7412	260.327	64.6464	0.00993029		13	2845	-3.058	30.2954		13	99.8692	30.5634	0.5053	49.063	1.164	30.4088	62.4115	69.3057		13	40.9453	1.10149	97.3098	165.35	145.78	19.57
14	391.319	27.1964	91.0306		14	0.2282	97.8	3.088	244.935	60.4617	0.0186291		14	2758	1.23278	33.006		14	100.15	27.7575	0.7172	61.94	1.9336	28.4848	69.7505	72.3922		14	45.1541	0.54031	98.8034	148.58	128.66	19.92
15	385.707	27.4769	89.5575		15	0.4727	144.255	1.9336	232.429	57.6238	0.0173374		15	2792	-0.895415	32.0765		15	98.4662	23.8293	0.8965	79.381	2.5108	31.1784	73.2459	74.6369		15	35.6141	0	100	158.77	137.23	21.54
16	380.095	10.6416	92.3634		16	1.2225	225.755	2.7032	214.151	52.8619	0.0271325		16	2767	5.16805	33.3803		16	99.8692	24.3905	0.489	73.024	2.3184	30.024	72.3609	75.4787		16	38.42	0.25972	99.324	140.45	120.04	20.41
17	459.959	48.5212	102.859		17	0.9128	365.446	2.3184	200.5	49.5454	0.0439214		17	2910	6.56357	35.3469		17	98.1856	21.0234	0.4401	83.293	0.5868	27.9076	75.2021	77.1623		17	41.2259	0	100	177.24	152.56	24.68
18	451.541	3.06562	112.119		18	0.2771	391.2	1.164	192.804	47.91	0.0470167		18	3101	7.70719	36.1557		18	99.308	17.6563	0.3912	77.262	2.3184	30.6012	73.1034	81.6517		18	37.2976	0	100	161.27	138.03	23.24
19	507.659	20.4622	121.799		19	0.9291	431.95	2.5108	181.645	44.7835	0.0519142		19	3340	4.52096	36.4668		19	102.956	19.0592	0.2934	71.394	1.3564	30.2164	71.1286	83.8964		19	40.1035	0	100	133.74	112.16	21.58
20	583.418	49.363	133.514		20	0.6683	472.7	2.7032	162.79	40.0216	0.0715218		20	3491	7.21856	38.2452		20	99.5886	14.2892	0.6357	75.306	1.5488	30.7936	71.857	85.2994		20	39.5423	0	100	144.72	122.58	22.14
21	577.807	9.2386	142.142		21	0.4727	536.27	3.2804	156.248	38.2419	0.0811403		21	3743	7.13332	37.9754												21	34.4917	0	100	163.65	140.11	23.54
22	600.254	12.3251	146.982		22	1.0595	625.105	0.9716	146.243	36.3179	0.0945815		22	4010	5.23691	36.6539												22	33.6499	0	100	168.44	142.67	25.77
23	647.954	0	161.989		23	0.7987	643.035	2.7032	140.856	34.5382	0.0772837		23	4220	4.45498	38.3859												23	44.3124	0	100	175.07	149.86	25.21
24	692.849	14.8504	169.5		24	0.3097	629.18	3.088	141.241	34.5382	0.0756185		24	4408	6.1706	38.4527												24	37.8588	0	100	168.44	144.39	24.05
25	734.937	54.6942	170.061		25	1.1573	670.745	1.9336	156.248	38.5786	0.080614		25	4680	3.84615	36.3378												25	40.1035	0	100	141.49	117.52	23.97
26	754.578	51.0465	175.883		26	0.8965	676.45	1.9336	170.101	42.0418	0.0812997		26	4860	4.93827	36.1899												26	33.9305	0	100	162.27	135.79	26.48
27	762.996	20.4622	185.633		27	0.8639	692.75	2.7032	170.87	42.0418	0.0832587		27	5100	4.58824	36.3987												27	36.4558	0	100	151.82	126.58	25.24
28	791.055	8.39683	195.665		28	1.1736	723.72	2.3184	173.179	42.7152	0.0869808		28	5334	5.6243	36.6825												28	35.6141	0	100	140.11	115.64	24.47
29	849.979	33.0887	204.223		29	0.7335	820.705	1.9336	185.493	45.8898	0.0986371		29	5634	4.93433	36.2482												29	38.42	0	100	133.28	110.89	22.39
30	861.203	17.6563	210.887		30	0.7987	762.025	3.088	192.034	47.2366	0.0915846		30	5912	4.87145	35.6709												30	33.6499	0	100	157.56	131.14	26.42
31	922.932	14.8504	227.02		31	0.3586	800.33	1.9336	196.267	48.5834	0.0961883		31	6200	2.62903	36.6162												31	36.7364	0	100	168.65	141.29	27.36
32	959.409	42.9094	229.125		32	0.7661	786.475	3.2804	204.348	50.2669	0.0945231		32	6363	5.13909	36.0089												32	36.1752	0	100	147.2	118.56	28.64
33	1026.54	56.9389	242.401		33	0.6357	766.1	2.5108	209.735	51.8061	0.0920743		33	6690	3.30344	36.2333												33	42.0676	0	100	153.48	125.27	28.21
34	1060.21	43.19	254.256		34	0.6683	789.735	1.9336	220.51	54.644	0.0949149		34	6911	2.90841	36.79
35	1048.99	15.131	258.465		35	0.2771	823.15	2.7032	212.044	52.3352	0.0989309		35	7112	3.7261	36.342
36	1105.11	28.8799	269.057		36	0.1793	819.075	2.126	231.284	57.2895	0.0984412		36	7377	2.38579	36.4724
37	1116.33	12.0445	276.072		37	0.7661	827.225	2.3184	211.274	52.239	0.0994207		37	7553	1.99921	36.5513
38	1121.94	19.6204	275.581		38	0.9454	779.14	3.088	217.816	53.682	0.0936415		38	7704		35.7711
Figure7
	Sample0			W1			W2			W3			W4
	unclassified	24.22		unclassified	26.82		unclassified	19.56		Nitrosomonas	32.48		Nitrosomonas	61.91
	Aridibacter	5.25		Zavarzinella	8.32		Aridibacter	15.97		unclassified	19.72		unclassified	14.77
	Saccharibacteria_genera_incertae_sedis	3.75		Aridibacter	5.52		Nitrospira	15.22		Simplicispira	9.76		Simplicispira	5.06
	Ferruginibacter	2.88		Thermogutta	5.15		Ferruginibacter	5.6		Dokdonella	9.17		Dokdonella	3.98
	Thauera	2.85		Gemmata	4.38		Nitrosomonas	2.36		Thermomonas	4.51		Thermomonas	1.85
	Armatimonadetes_gp5	2.8		Pirellula	2.88		Zavarzinella	2.12		Nitrospira	3.52		Ferruginibacter	1.27
	Zavarzinella	2.46		Ferruginibacter	2.78		Armatimonadetes_gp5	1.88		Chryseolinea	2.59		Aridibacter	1.1
	Nitrospira	2.14		Longilinea	2.65		Longilinea	1.83		Ferruginibacter	2.34		Arenimonas	1.02
	Gemmata	1.98		Armatimonadetes_gp5	2.52		Terrimonas	1.81		Aridibacter	1.15		Chryseolinea	0.82
	Longilinea	1.97		Nitrospira	1.53		Dokdonella	1.71		Chiayiivirga	1.03		Comamonas	0.81
	Ottowia	1.71		Aquisphaera	1.4		Povalibacter	1.38		Acetobacteroides	1.03		Acinetobacter	0.73
	Pirellula	1.7		Caldilinea	1.38		Gp4	1.29		Povalibacter	1		Steroidobacter	0.58
	Dokdonella	1.66		Gimesia	1.31		Mizugakiibacter	1.17		Arenimonas	0.95		Brevundimonas	0.55
	Thermogutta	1.32		Saccharibacteria_genera_incertae_sedis	1.19		Portibacter	1.07		Terrimonas	0.63		Ottowia	0.49
	Tepidisphaera	1.22		Blastopirellula	1.11		Chryseolinea	0.94		Ottowia	0.61		Truepera	0.33
	Kofleria	1.06		Tepidisphaera	1.11		Arenimonas	0.94		Brevundimonas	0.59		Terrimonas	0.29
	Sediminibacterium	0.94		Gp6	1.04		Pirellula	0.91		Mesorhizobium	0.49		Bdellovibrio	0.26
	Parcubacteria_genera_incertae_sedis	0.94		Dokdonella	1.01		Parasegetibacter	0.88		Chryseobacterium	0.4		Chiayiivirga	0.25
	Gemmobacter	0.86		Phycisphaera	0.91		Gemmata	0.88		Acidovorax	0.31		Fluviicola	0.22
	Rhodocyclus	0.86		Gp4	0.87		Sphingobium	0.86		Tepidisphaera	0.29		Sphingopyxis	0.18
	Subdivision3_genera_incertae_sedis	0.84		Reyranella	0.84		Thermogutta	0.78		Aquamicrobium	0.25		Haliscomenobacter	0.18
	Nannocystis	0.82		Thiogranum	0.83		Phaeodactylibacter	0.75		Portibacter	0.24		Mesorhizobium	0.17
	Gp4	0.8		Povalibacter	0.82		Aggregicoccus	0.69		Phreatobacter	0.21		Nitrospira	0.17
	Aquisphaera	0.77		Chryseolinea	0.8		Blastochloris	0.64		Denitratisoma	0.21		Fulvivirga	0.14
	Gimesia	0.72		Planctomicrobium	0.72		Tepidisphaera	0.54		Ornatilinea	0.19		Denitratisoma	0.12
	Arenimonas	0.69		Kofleria	0.55		Phreatobacter	0.5		Hydrogenophaga	0.18		Devosia	0.12
	Zoogloea	0.64		Arenimonas	0.52		Ornatilinea	0.49		Jiella	0.18		Hydrogenophaga	0.1
	Spartobacteria_genera_incertae_sedis	0.59		Spartobacteria_genera_incertae_sedis	0.5		Gp17	0.48		Phycisphaera	0.17		Aquamicrobium	0.1
	Terrimonas	0.58		Rubinisphaera	0.49		Gp6	0.41		Bdellovibrio	0.16		Pseudoxanthomonas	0.1
	Comamonas	0.57		Roseimicrobium	0.47		Sphingorhabdus	0.41		Haliscomenobacter	0.16		Paracoccus	0.08
	Azospira	0.57		Gp17	0.43		Caldilinea	0.4		Sphingobium	0.16		Pseudomonas	0.08
	Gp6	0.57		Roseomonas	0.43		Aquisphaera	0.38		Armatimonadetes_gp5	0.14		Portibacter	0.08
	Phycisphaera	0.56		Phaeodactylibacter	0.4		Jiella	0.37		Pseudomonas	0.14		Tepidisphaera	0.08
	Povalibacter	0.52		Bellilinea	0.4		Thermomonas	0.37		Comamonas	0.13		Parasegetibacter	0.07
	Phaeodactylibacter	0.51		Subdivision3_genera_incertae_sedis	0.39		Ottowia	0.35		Opitutus	0.13		Terrimicrobium	0.07
	Caldilinea	0.51		Mizugakiibacter	0.36		Reyranella	0.34		Aspromonas	0.12		Jiella	0.06
	Hyphomicrobium	0.5		Melioribacter	0.35		Gemmobacter	0.34		Aquimonas	0.11		Ornatilinea	0.06
	Ornatilinea	0.5		Rhodopirellula	0.34		Kofleria	0.34		Thauera	0.11		Opitutus	0.06
	Litorilinea	0.5		Azohydromonas	0.33		Elioraea	0.33		Acinetobacter	0.11		Phreatobacter	0.05
	Sphingorhabdus	0.5		Parcubacteria_genera_incertae_sedis	0.32		Anderseniella	0.32		Sphingorhabdus	0.11		Armatimonadetes_gp5	0.05
	Rubinisphaera	0.5		Gp10	0.32		Phycisphaera	0.31		Pseudoxanthomonas	0.1		Chryseobacterium	0.05
	Haliangium	0.46		Planctopirus	0.3		Saccharibacteria_genera_incertae_sedis	0.31		Fluviicola	0.09		Aquimonas	0.04
	Methyloversatilis	0.45		Caldimonas	0.3		Niabella	0.27		Gemmobacter	0.09		Defluviimonas	0.04
	Roseibacillus	0.43		Denitratisoma	0.29		Melioribacter	0.27		Sporichthya	0.09		Massilia	0.04
	Nitrosomonas	0.43		Terrimonas	0.29		Ignavibacterium	0.27		Devosia	0.09		Phycisphaera	0.04
	Portibacter	0.42		Blastocatella	0.29		Meganema	0.26		Piscinibacter	0.08		Pelomonas	0.04
	Roseimicrobium	0.42		Gemmobacter	0.28		Aquimonas	0.25		Lactobacillus	0.08		Gemmobacter	0.04
	Dechloromonas	0.42		Labilithrix	0.27		Roseimicrobium	0.25		Ignavibacterium	0.08		Dechloromonas	0.03
	Labilithrix	0.42		Lacibacterium	0.27		Planctomicrobium	0.25		Leptothrix	0.08		Povalibacter	0.03
	Chryseolinea	0.41		Nannocystis	0.25		Defluviimonas	0.23		Defluviimonas	0.08		Ramlibacter	0.03
	Blastochloris	0.4		Hyphomicrobium	0.25		Candidatus Hydrogenedens	0.22		Pelolinea	0.07		Phyllobacterium	0.03
	Novosphingobium	0.4		Gemmatimonas	0.23		Bdellovibrio	0.21		Caldilinea	0.07		Candidatus Hydrogenedens	0.03
	Caldimonas	0.39		Ignavibacterium	0.23		Litorilinea	0.21		Gp4	0.07		Longilinea	0.03
	Planctopirus	0.37		Candidatus Hydrogenedens	0.23		Blastopirellula	0.2		Nitrolancea	0.07		Sphingobium	0.03
	Jiella	0.37		Sphingorhabdus	0.22		Blastocatella	0.2		Gp17	0.06		Gp3	0.03
	Lautropia	0.37		Singulisphaera	0.22		Bauldia	0.2		Mizugakiibacter	0.06		Sporichthya	0.03
	Simplicispira	0.37		Portibacter	0.21		Spartobacteria_genera_incertae_sedis	0.19		Gemmata	0.06		Gemmatimonas	0.03
	Frateuria	0.36		Brevifollis	0.2		Novosphingobium	0.19		Enterococcus	0.06		Thauera	0.02
	Mizugakiibacter	0.35		Parachlamydia	0.2		Gp10	0.19		Meganema	0.06		Zavarzinella	0.02
	Reyranella	0.31		Ottowia	0.2		Acidovorax	0.19		Longilinea	0.06		Pseudolabrys	0.02
	Prosthecobacter	0.31		Zhizhongheella	0.2		Acinetobacter	0.18		Zavarzinella	0.06		Burkholderia	0.02
	Parachlamydia	0.31		Byssovorax	0.19		Brevundimonas	0.18		Dechloromonas	0.06		Flavobacterium	0.02
	Gp3	0.3		Dechloromonas	0.19		Lacibacterium	0.17		Sphingopyxis	0.05		Sediminibacterium	0.02
	Brevifollis	0.29		Frateuria	0.19		Haliea	0.17		Pseudorhodoferax	0.05		Acidovorax	0.02
	Ilumatobacter	0.29		Blastochloris	0.18		Hyphomicrobium	0.16		Pseudolabrys	0.05		Gp4	0.02
	Denitratisoma	0.29		Bdellovibrio	0.17		Sphingopyxis	0.16		Bosea	0.05		Asinibacterium	0.02
	Blastopirellula	0.29		Haliea	0.17		Segetibacter	0.16		Asinibacterium	0.05		Frateuria	0.02
	Defluviimonas	0.28		Thauera	0.17		Exiguobacterium	0.15		Thermomarinilinea	0.05		Persicirhabdus	0.02
	Niveispirillum	0.27		Anaeromyxobacter	0.16		Caldimonas	0.14		Pirellula	0.05		Bosea	0.02
	Bdellovibrio	0.26		Haliscomenobacter	0.16		Simplicispira	0.14		Rheinheimera	0.04		Meganema	0.02
	Roseicitreum	0.26		Rhodocyclus	0.16		Owenweeksia	0.14		Gemmatimonas	0.04		Aquihabitans	0.02
	Polyangium	0.26		Gp3	0.16		Roseomonas	0.12		Kofleria	0.04		Caldimonas	0.02
	Gemmatimonas	0.26		Romboutsia	0.15		Gimesia	0.12		Frateuria	0.04		Sphingomonas	0.02
	Gp10	0.24		Coxiella	0.15		Methyloversatilis	0.11		Aggregicoccus	0.04		Mizugakiibacter	0.02
	Sideroxydans	0.23		Methyloversatilis	0.15		Prosthecobacter	0.11		Saccharibacteria_genera_incertae_sedis	0.04		Elioraea	0.02
	Azohydromonas	0.21		Desulfacinum	0.14		Haliscomenobacter	0.11		Rhodoferax	0.04		Gemmata	0.02
	Sporichthya	0.21		Telmatospirillum	0.14		Devosia	0.11		Flavobacterium	0.04		Pedobacter	0.02
	Ignavibacterium	0.21		Niabella	0.14		Opitutus	0.11		Segetibacter	0.04		Saccharibacteria_genera_incertae_sedis	0.01
	Thiogranum	0.2		Nitrospirillum	0.13		Byssovorax	0.1		Caldimonas	0.04		Rhizomicrobium	0.01
	Candidatus Endomicrobium	0.2		Exiguobacterium	0.13		Sandaracinus	0.1		Ilumatobacter	0.04		Thermogutta	0.01
	Planctomicrobium	0.2		Ohtaekwangia	0.13		Pedomicrobium	0.1		Sulfuritalea	0.04		Aspromonas	0.01
	Nitrospirillum	0.19		Schlesneria	0.13		Stella	0.1		Parasegetibacter	0.04		Segetibacter	0.01
	Mesorhizobium	0.19		Chryseobacterium	0.13		Latescibacteria_genera_incertae_sedis	0.09		Bellilinea	0.04		Reyranella	0.01
	Levilinea	0.18		Roseicitreum	0.13		Planctopirus	0.09		Salinirepens	0.03		Pirellula	0.01
	Methylocystis	0.18		Mycobacterium	0.13		Asinibacterium	0.09		Shinella	0.03		Blastocatella	0.01
	Haliscomenobacter	0.18		Novosphingobium	0.12		Sporichthya	0.08		Pseudofulvimonas	0.03		Owenweeksia	0.01
	Exiguobacterium	0.17		Devosia	0.12		Pseudoxanthomonas	0.08		Blastocatella	0.03		Tahibacter	0.01
	Melioribacter	0.17		Neochlamydia	0.12		Neochlamydia	0.08		Phaeodactylibacter	0.03		Methyloversatilis	0.01
	Aquimonas	0.17		Bradyrhizobium	0.12		Hydrogenophaga	0.08		Vasilyevaea	0.03		Nitrobacter	0.01
	Piscinibacter	0.17		Simkania	0.12		Ensifer	0.08		Aquihabitans	0.03		Schlegelella	0.01
	Singulisphaera	0.17		Azospira	0.11		Azospira	0.08		Gp3	0.03		Limnobacter	0.01
	Bradyrhizobium	0.16		Elioraea	0.11		Mesorhizobium	0.08		Elioraea	0.02		Shinella	0.01
	Roseomonas	0.16		Orientia	0.11		Rubinisphaera	0.08		Thioprofundum	0.02		Kofleria	0.01
	Niabella	0.16		Sporichthya	0.11		Luteimonas	0.08		Thermogutta	0.02		Thioalbus	0.01
	Sulfuritalea	0.15		Opitutus	0.11		Piscinibacter	0.07		Nitrobacter	0.02		Mycobacterium	0.01
	Haliea	0.15		Aquimonas	0.1		Lautropia	0.07		Limnohabitans	0.02		Pseudofulvimonas	0.01
	Citrobacter	0.14		Sandaracinus	0.1		Gemmatimonas	0.07		Vampirovibrio	0.02		Thioprofundum	0.01
	Rhodopirellula	0.14		Comamonas	0.1		Nitrospirillum	0.07		Roseomonas	0.02		Aquabacterium	0.01
	Aquihabitans	0.14		Pedomicrobium	0.09		Rhizomicrobium	0.07		Amorphus	0.02		Stenotrophomonas	0.01
	Jahnella	0.14		Niveispirillum	0.09		Citrobacter	0.07		Melioribacter	0.02		Tepidicella	0.01
	Leptothrix	0.13		Latescibacteria_genera_incertae_sedis	0.09		Dechloromonas	0.07		Gp10	0.02		Diaphorobacter	0.01
	Candidatus Hydrogenedens	0.13		Ornatilinea	0.09		Thermorudis	0.06		Gp6	0.02		Bellilinea	0.01
	Rhizomicrobium	0.13		Citrobacter	0.09		Bellilinea	0.06		Zoogloea	0.02		Phaeodactylibacter	0.01
	Meganema	0.12		Aquihabitans	0.09		Subdivision3_genera_incertae_sedis	0.06		Reyranella	0.02		Neochlamydia	0.01
	Segetibacter	0.12		Albimonas	0.09		Gp3	0.06		Exiguobacterium	0.02		Vulcaniibacterium	0.01
	Bellilinea	0.12		Filomicrobium	0.09		Parachlamydia	0.06		Planctomicrobium	0.02		Gp17	0.01
	Steroidobacter	0.12		Polyangium	0.08		Inquilinus	0.06		Ornithobacterium	0.02		Ignavibacterium	0.01
	Sphingopyxis	0.12		Litorilinea	0.08		Pelolinea	0.06		Mycobacterium	0.02		Gp10	0.01
	Gp17	0.12		Vampirovibrio	0.08		Roseicitreum	0.06		Novosphingobium	0.02		Seonamhaeicola	0.01
	Ohtaekwangia	0.12		Ilumatobacter	0.08		Mycobacterium	0.06		Sediminibacterium	0.02		Lautropia	0.01
	Pseudofulvimonas	0.12		Inquilinus	0.08		Labilithrix	0.06		Inhella	0.02		Moheibacter	0.01
	Lacibacterium	0.11		Minicystis	0.07		Roseibacillus	0.06		Lampropedia	0.02		Nitrospirillum	0.01
	Rickettsia	0.11		Zoogloea	0.07		Telmatospirillum	0.05		Truepera	0.02		Parafilimonas	0.01
	Rhizobacter	0.11		Anderseniella	0.07		Anaeromyxobacter	0.05		Azospira	0.02		Azospira	0.01
	Pedomicrobium	0.11		Desertibacter	0.07		Gp7	0.05		Desulfovermiculus	0.02		Niabella	0.01
	Blastocatella	0.11		Segetibacter	0.07		Pseudomonas	0.05		Vulcaniibacterium	0.02		Cryobacterium	0.01
	Desertibacter	0.1		Meganema	0.06		Ohtaekwangia	0.05		Hyphomicrobium	0.02		Castellaniella	0.01
	Opitutus	0.1		Steroidobacter	0.06		Azohydromonas	0.05		Blastopirellula	0.02		Aquisphaera	0.01
	Anaeromyxobacter	0.1		Isosphaera	0.06		Ilumatobacter	0.05		Litorilinea	0.02		Zoogloea	0.01
	Thermorudis	0.1		Bauldia	0.06		Singulisphaera	0.05		Thiogranum	0.02		Luteimonas	0
	Devosia	0.1		Lautropia	0.06		Anaerolinea	0.04		Methyloversatilis	0.02		Gimesia	0
	Asinibacterium	0.1		Roseibacillus	0.06		Aquihabitans	0.04		Delftia	0.01		Janthinobacterium	0
	Gp7	0.09		Anaerolinea	0.06		Rhizobacter	0.04		Subdivision3_genera_incertae_sedis	0.01		Roseomonas	0
	Bauldia	0.09		Prosthecobacter	0.06		Salinibacterium	0.04		Lacibacterium	0.01		Desulfovermiculus	0
	Phycicoccus	0.09		Sideroxydans	0.06		Afipia	0.04		Spartobacteria_genera_incertae_sedis	0.01		Sphingorhabdus	0
	Neochlamydia	0.09		Phreatobacter	0.06		Steroidobacter	0.04		Candidatus Hydrogenedens	0.01		Novosphingobium	0
	Aquabacterium	0.09		Pelomonas	0.06		Rhodocyclus	0.04		Gardnerella	0.01		Planctopirus	0
	Minicystis	0.08		Rubrivivax	0.06		Heliimonas	0.04		Phyllobacterium	0.01		Ensifer	0
	Acinetobacter	0.08		Pseudomonas	0.05		Bradyrhizobium	0.03		Planctopirus	0.01		Jahnella	0
	Verrucomicrobium	0.08		Acinetobacter	0.05		Aciditerrimonas	0.03		Steroidobacter	0.01		Ralstonia	0
	Thiobacter	0.08		Gp7	0.05		Niveispirillum	0.03		Stenotrophomonas	0.01		Roseimicrobium	0
	Orientia	0.08		Barnesiella	0.05		Vasilyevaea	0.03		Neochlamydia	0.01		Azohydromonas	0
	Sphingobium	0.08		Defluviimonas	0.05		Escherichia/Shigella	0.03		Melaminivora	0.01		Lampropedia	0
	Mycobacterium	0.07		Haliangium	0.05		Pseudofulvimonas	0.03		Marixanthomonas	0.01		Sulfuritalea	0
	Collimonas	0.07		Candidatus Endomicrobium	0.05		Renibacterium	0.03		Roseimicrobium	0.01		Aggregicoccus	0
	Byssovorax	0.07		Methylocystis	0.05		Lysobacter	0.03		Microbacterium	0.01		Telmatospirillum	0
	Elioraea	0.07		Piscinibacter	0.05		Coxiella	0.03		Aliidiomarina	0.01		Pedomicrobium	0
	Desulfacinum	0.07		Defluviicoccus	0.05		Delftia	0.03		Aquisphaera	0.01		Vampirovibrio	0
	Lewinella	0.07		Solitalea	0.05		Ornithobacterium	0.03		Thiobacter	0.01		Alicycliphilus	0
	Filomicrobium	0.06		Aquicella	0.05		Methylocystis	0.03		Paucibacter	0.01		Dongia	0
	Albimonas	0.06		Clostridium sensu stricto	0.05		Chryseobacterium	0.03		Gimesia	0.01		Geothrix	0
	Stella	0.06		Rhizomicrobium	0.04		Aminobacter	0.03		Soonwooa	0.01		Proteiniclasticum	0
	Paludibaculum	0.06		Mesorhizobium	0.04		Comamonas	0.02		Anaeromyxobacter	0.01		Clostridium sensu stricto	0
	Desulforegula	0.06		Verrucomicrobium	0.04		Flavitalea	0.02		Gp7	0.01		Myroides	0
	Nitrobacter	0.06		Levilinea	0.04		Defluviicoccus	0.02		Pelomonas	0.01		Latescibacteria_genera_incertae_sedis	0
	Pelolinea	0.06		Rhizobacter	0.04		Tahibacter	0.02		Jahnella	0.01		Delftia	0
	Azonexus	0.06		Jahnella	0.04		Thauera	0.02		Methylibium	0.01		Ilumatobacter	0
	Vasilyevaea	0.06		Sulfuritalea	0.04		Schlesneria	0.02		Parachlamydia	0.01		Inhella	0
	Schlesneria	0.06		Salinibacterium	0.04		Gp16	0.02		Diaphorobacter	0.01		Bauldia	0
	Gemmiger	0.05		Aggregicoccus	0.04		Brevifollis	0.02		Roseiarcus	0.01		Rhizobium	0
	Janibacter	0.05		Stella	0.04		Fulvivirga	0.02		Latescibacteria_genera_incertae_sedis	0.01		Rheinheimera	0
	Vampirovibrio	0.05		Pseudofulvimonas	0.04		Jahnella	0.02		Azohydromonas	0.01		Iamia	0
	Anderseniella	0.05		Pseudobacteriovorax	0.04		Parcubacteria_genera_incertae_sedis	0.02		Stella	0.01		Psychrobacter	0
	Tabrizicola	0.05		Lewinella	0.04		Marinicauda	0.02		Luteimonas	0.01		Niveispirillum	0
	Anaerolinea	0.05		Aquabacterium	0.04		Rubrivivax	0.02		Owenweeksia	0.01		Planctomicrobium	0
	Pseudomonas	0.05		Methylotenera	0.04		Roseovarius	0.02		Pedobacter	0.01		Hyphomicrobium	0
	Defluviicoccus	0.05		Flavobacterium	0.04		Simkania	0.02		Intrasporangium	0.01		Gp16	0
	Isosphaera	0.05		Afipia	0.04		Levilinea	0.02		Halomonas	0.01		Haliea	0
	Kineosporia	0.05		Mariniphaga	0.03		Thiohalobacter	0.02		Rubinisphaera	0.01		Stella	0
	Sandaracinus	0.05		Escherichia/Shigella	0.03		Conexibacter	0.02		Rhizomicrobium	0.01		Rubinisphaera	0
	Ktedonobacter	0.04		Sphingopyxis	0.03		Sphingomonas	0.02		Gp16	0.01		Melaminivora	0
	Rhodoferax	0.04		Phaselicystis	0.03		Ramlibacter	0.02		Zhizhongheella	0.01		Desulfomonile	0
	Salinibacterium	0.04		Gp16	0.03		Tetrasphaera	0.02		Pseudaminobacter	0.01		Kaistia	0
	Legionella	0.04		Derxia	0.03		Pseudolabrys	0.02		Massilia	0.01		Serpens	0
	Inquilinus	0.04		Malonomonas	0.03		Aquabacterium	0.02		Tahibacter	0.01		Ohtaekwangia	0
	Roseateles	0.04		Sphingobium	0.03		Pelomonas	0.02		Phycicoccus	0.01		Lysobacter	0
	Latescibacteria_genera_incertae_sedis	0.04		Amorphus	0.03		Denitratisoma	0.02		Sideroxydans	0.01		Vasilyevaea	0
	Paludibacter	0.04		Asinibacterium	0.03		Candidatus Solibacter	0.02		Aquabacterium	0.01		Paludibaculum	0
	Persicirhabdus	0.04		Acidovorax	0.03		Desulfurivibrio	0.02		Anderseniella	0.01		Piscinibacter	0
	Labrys	0.04		Lysobacter	0.03		Ktedonobacter	0.02		Serpens	0.01		Flavitalea	0
	Cloacibacterium	0.04		Ideonella	0.02		Flavihumibacter	0.02		Seonamhaeicola	0.01		Proteocatella	0
	Lysobacter	0.04		Ktedonobacter	0.02		Thiovirga	0.02		Methylobacter	0.01		Shewanella	0
	Phenylobacterium	0.04		Legionella	0.02		Bosea	0.01		Limnobacter	0.01		Pseudaminobacter	0
	Methylotenera	0.04		Conexibacter	0.02		Verrucomicrobium	0.01		Kallotenue	0.01		Singulisphaera	0
	Microgenomates_genera_incertae_sedis	0.04		Paludibaculum	0.02		Rickettsia	0.01		Planococcus	0.01		Rubrobacter	0
	Ramlibacter	0.03		Lactobacillus	0.02		Vampirovibrio	0.01		Afipia	0.01		Methylotenera	0
	Ideonella	0.03		Swingsia	0.02		Flavobacterium	0.01		Phenylobacterium	0.01		Croceicoccus	0
	Aggregicoccus	0.03		Kineosporia	0.02		Geopsychrobacter	0.01		Nitrosospira	0.01		Gp6	0
	Zhizhongheella	0.03		Turneriella	0.02		Desulfovermiculus	0.01		Nesterenkonia	0.01		Planococcus	0
	Aminobacter	0.03		Thiohalobacter	0.02		Geothrix	0.01		Rhizobacter	0.01		Gp7	0
	Terrimicrobium	0.03		Luteimonas	0.02		Frateuria	0.01		Haliea	0.01		Cobetia	0
	Bifidobacterium	0.03		Azonexus	0.02		Aquicella	0.01		Labilithrix	0.01		Lacibacter	0
	Afipia	0.03		Smithella	0.02		Minicystis	0.01		Schlesneria	0.01		Hylemonella	0
	Alsobacter	0.03		Ornithinibacter	0.02		Phenylobacterium	0.01		Telmatospirillum	0.01		Phycicoccus	0
	Romboutsia	0.03		Labrys	0.02		Pyxidicoccus	0.01		Paenibacillus	0.01		Caenimonas	0
	Aciditerrimonas	0.03		Rickettsia	0.02		Phaselicystis	0.01		Tepidicella	0.01		Acetoanaerobium	0
	Oscillibacter	0.03		Fluviimonas	0.02		Methylotenera	0.01		Chryseomicrobium	0.01		Mariniphaga	0
	Turneriella	0.03		Simplicispira	0.02		Sideroxydans	0.01		Conexibacter	0.01		Byssovorax	0
	Hartmannibacter	0.03		Peredibacter	0.02		Erythromicrobium	0.01		Thiohalobacter	0.01		Aliidiomarina	0
	Acidovorax	0.03		Bacteroides	0.02		Methylopila	0.01		Azomonas	0.01		Roseibacillus	0
	Curvibacter	0.03		Methylomonas	0.02		Rhizobium	0.01		Alicycliphilus	0.01		Rhodoplanes	0
	Macellibacteroides	0.03		Geminicoccus	0.02		Clostridium sensu stricto	0.01		Bauldia	0.01		Belliella	0
	Ruminococcus2	0.03		Thermomarinilinea	0.01		Thioprofundum	0.01		Oscillibacter	0.01		Salinibacterium	0
	Gp16	0.03		Oligoflexus	0.01		Candidatus Kuenenia	0.01		Pedomicrobium	0.01		Flavisolibacter	0
	Bacteroides	0.03		Thermodesulfobium	0.01		Nitrobacter	0.01		Sandaracinus	0.01		Proteiniphilum	0
	Phaselicystis	0.03		Cloacibacterium	0.01		Thiogranum	0.01		Turneriella	0		Candidatus Brocadia	0
	Inhella	0.03		Mangroviflexus	0.01		Stenotrophomonas	0.01		Gordonia	0		Tabrizicola	0
	Saccharofermentans	0.03		Akkermansia	0.01		Sulfuritalea	0.01		Lautropia	0		Parcubacteria_genera_incertae_sedis	0
	Geothrix	0.03		Methylosarcina	0.01		Turneriella	0.01		Gaiella	0		Azomonas	0
	Methylopila	0.03		Diplorickettsia	0.01		Azoarcus	0.01		Thiobacillus	0		Gordonia	0
	Iamia	0.03		Janibacter	0.01		Tabrizicola	0.01		Thioalbus	0		Phenylobacterium	0
	Arcobacter	0.03		Desulfomonile	0.01		Gluconacetobacter	0.01		Enterobacter	0		Methylopila	0
	Methylobacter	0.03		Curvibacter	0.01		Terrimicrobium	0.01		Macellibacteroides	0		Thiohalophilus	0
	Meniscus	0.03		Enterorhabdus	0.01		Legionella	0.01		Alsobacter	0		Methylocystis	0
	Trichococcus	0.03		Ferribacterium	0.01		Desulfomonile	0.01		Serratia	0		Erysipelothrix	0
	Bordetella	0.02		Persicirhabdus	0.01		Silanimonas	0.01		Paenisporosarcina	0		Exiguobacterium	0
	Phreatobacter	0.02		Geopsychrobacter	0.01		Desulfoprunum	0.01		Paracoccus	0		Rhodobaca	0
	Collinsella	0.02		Kinneretia	0.01		Caulobacter	0.01		Schlegelella	0		Gaiella	0
	Flavobacterium	0.02		WPS-1_genera_incertae_sedis	0.01		Romboutsia	0.01		Mangroviflexus	0		Geopsychrobacter	0
	Kallotenue	0.02		Stenotrophomonas	0.01		Persicirhabdus	0.01		Solitalea	0		Propionibacterium	0
	Pseudolabrys	0.02		Inhella	0.01		Vulcaniibacterium	0.01		Singulisphaera	0		Filimonas	0
	Kinneretia	0.02		Vulgatibacter	0.01		Paludibaculum	0.01		Nannocystis	0		Deinococcus	0
	Malonomonas	0.02		Terrimicrobium	0.01		Methylosinus	0.01		Aeromonas	0		Flavihumibacter	0
	Flavihumibacter	0.02		Methylopila	0.01		Gaiella	0.01		Undibacterium	0		Perlucidibaca	0
	Prosthecomicrobium	0.02		Thiobacter	0.01		Elstera	0.01		Solibacillus	0		Rhodoferax	0
	SR1_genera_incertae_sedis	0.02		Thiopseudomonas	0.01		Schlegelella	0.01		Nitrospirillum	0		Nitrolancea	0
	Cloacibacillus	0.02		Nitrolancea	0.01		Desulfatitalea	0.01		Cloacibacterium	0		Derxia	0
	Methylomonas	0.02		Fimbriimonas	0.01		Aquamicrobium	0.01		Rhodopirellula	0		Azonexus	0
	Simkania	0.02		Schlegelella	0.01		Filimonas	0.01		Gluconacetobacter	0		Legionella	0
	Coxiella	0.02		Gluconacetobacter	0.01		Aspromonas	0.01		Levilinea	0		Curvibacter	0
	Desulfobulbus	0.02		Prevotella	0.01		Nitrosospira	0.01		Polyangium	0		Oligotropha	0
	Aeromonas	0.02		Holophaga	0.01		Sorangium	0.01		Desulfacinum	0		Arcobacter	0
	Sphingomonas	0.02		Parabacteroides	0.01		Azovibrio	0.01		Roseibacillus	0		Methylocapsa	0
	Roseburia	0.02		Sinobacterium	0.01		Methylocapsa	0.01		Silanimonas	0		Nesterenkonia	0
	Nitrosospira	0.02		Jiella	0.01		Methanothrix	0.01		Ohtaekwangia	0		Oscillibacter	0
	Luteimonas	0.02		Methanothrix	0.01		Gp1	0.01		Simkania	0		Litorilinea	0
	Ferribacterium	0.02		Desulfoprunum	0.01		Truepera	0.01		Cellvibrio	0		Blastochloris	0
	Anaerovorax	0.02		Beggiatoa	0.01		Filomicrobium	0.01		Prosthecobacter	0		Sandaracinus	0
	Thiobacillus	0.02		Pseudohaliea	0.01		Ideonella	0.01		Clostridium XlVa	0		Rhodopila	0
	Sulfitobacter	0.02		Geothrix	0.01		Bacillus	0.01		Arthrobacter	0		Lacibacterium	0
	Deinobacterium	0.02		Saccharofermentans	0.01		Ornithinibacter	0.01		Faecalibacterium	0		Desulfarculus	0
	Clostridium sensu stricto	0.02		Aciditerrimonas	0.01		Thermodesulfovibrio	0.01		Hafnia	0		Conexibacter	0
	Variovorax	0.02		Prosthecomicrobium	0.01		Shinella	0.01		Extensimonas	0		Ferritrophicum	0
	Ruminococcus	0.02		Thermomonas	0.01		Alsobacter	0.01		Ralstonia	0		Nocardioides	0
	Thermomonas	0.02		Limnohabitans	0.01		Plasticicumulans	0.01		Insolitispirillum	0		Leucobacter	0
	Rhodopila	0.02		Phenylobacterium	0.01		Desertibacter	0.01		Thiothrix	0		Blastopirellula	0
	Propionivibrio	0.02		Rhodoplanes	0.01		Zhizhongheella	0.01		Bradyrhizobium	0		Roseicitreum	0
	Parafilimonas	0.02		Tomitella	0.01		Microgenomates_genera_incertae_sedis	0.01		Anaerorhabdus	0		Chelativorans	0
	Geminicoccus	0.02		Desulforegula	0.01		Parasphingopyxis	0.01		Filomicrobium	0		Cellulosibacter	0
	Subdivision5_genera_incertae_sedis	0.02		Aspromonas	0.01		Candidatus Endomicrobium	0.01		Salisediminibacterium	0		Sphaerobacter	0
	Prevotella	0.02		Gaiella	0.01		Mangrovibacterium	0.01		Thiovirga	0		Fusibacter	0
	Peredibacter	0.02		Thermorudis	0.01		Isosphaera	0		Arcobacter	0		Pyxidicoccus	0
	Smithella	0.02		Intestinibacter	0.01		Acidothermus	0		Heliimonas	0		Ruminococcus	0
	Phascolarctobacterium	0.02		Sediminibacterium	0.01		Enhydrobacter	0		Sedimentibacter	0		Thiobacter	0
	Nitriliruptor	0.02		Desulfoconvexum	0.01		Nannocystis	0		Parcubacteria_genera_incertae_sedis	0
	Conexibacter	0.02		Flavitalea	0.01		Serpens	0		Prosthecomicrobium	0
	Geopsychrobacter	0.02		Sphingomonas	0.01		Halomonas	0		Xylophilus	0
	Telmatospirillum	0.01		Flavihumibacter	0.01		Mariniphaga	0		Klebsiella	0
	Pseudoalteromonas	0.01		Gillisia	0.01		Janibacter	0		Sporolactobacillaceae_incertae_sedis	0
	Mangrovibacterium	0.01		Leclercia	0.01		WPS-1_genera_incertae_sedis	0		Elstera	0
	Owenweeksia	0.01		Ercella	0.01		Desulforegula	0		Sunxiuqinia	0
	Methylosarcina	0.01		Pseudoxanthomonas	0.01		Leucobacter	0		Brucella	0
	Thermanaeromonas	0.01		Vasilyevaea	0.01		Petrimonas	0		Marinicauda	0
	Atribacteria_genera_incertae_sedis	0.01		Streptococcus	0.01		Syntrophobacter	0		Rhizorhapis	0
	Megasphaera	0.01		Bordetella	0.01		Blastomonas	0		Leuconostoc	0
	Paracoccus	0.01		Alloprevotella	0.01		Neorhizobium	0		Nitratireductor	0
	Sulfurospirillum	0.01		Allobaculum	0.01		Labrys	0		Acidisphaera	0
	Rhodobacter	0.01		Alsobacter	0.01		Methylibium	0		Meniscus	0
	Lachnospiracea_incertae_sedis	0.01		Pseudoduganella	0.01		Oceanibaculum	0		Caenimonas	0
	Intestinimonas	0.01		Bacillus	0.01		Serratia	0		Methylotenera	0
	Pseudoxanthomonas	0.01		Methylibium	0.01		Insolitispirillum	0		Clostridium sensu stricto	0
	Akkermansia	0.01		Leuconostoc	0.01		Formivibrio	0		Thermoleophilum	0
	Methylosinus	0.01		Thioprofundum	0.01		Collinsella	0		Sphingomonas	0
	Vulcaniibacterium	0.01		Microgenomates_genera_incertae_sedis	0.01		Rehaibacterium	0		Aciditerrimonas	0
	Methanothrix	0.01		Leptonema	0.01		Prevotella	0		Rhodopseudomonas	0
	Lactobacillus	0.01		Tabrizicola	0.01		Parvibaculum	0		Cloacibacillus	0
	Blautia	0.01		Serratia	0.01		Paracoccus	0		Cetobacterium	0
	Schlegelella	0.01		Faecalibacterium	0.01		Thiobacter	0		Roseicitreum	0
	Perlucidibaca	0.01		Brevundimonas	0.01		Paraherbaspirillum	0		Elizabethkingia	0
	Undibacterium	0.01		Chondromyces	0.01		Massilia	0		Ktedonobacter	0
	Sterolibacterium	0.01		Dichotomicrobium	0.01		Sphaerobacter	0		Alishewanella	0
	Alistipes	0.01		Nitrosomonas	0.01		Methylomonas	0		Phaselicystis	0
	Limisphaera	0.01		Caldithrix	0.01		Altererythrobacter	0		Formivibrio	0
	Streptococcus	0.01		Pseudolabrys	0.01		Sediminibacterium	0		Propionivibrio	0
	Bosea	0.01		Parafilimonas	0.01		Paucibacter	0		Piscicoccus	0
	Rubrivivax	0.01		Desulfobulbus	0.01		Acetobacteroides	0		Desulfurivibrio	0
	Brachymonas	0.01		Methylobacter	0.01		Streptococcus	0		Hylemonella	0
	Aquamicrobium	0.01		Aeromonas	0.01		Parafilimonas	0		Desertibacter	0
	Mariniphaga	0.01		Meniscus	0.01		Methanolinea	0		Fimbriimonas	0
	Desulfatitalea	0.01		Desulfurivibrio	0.01		Pseudohaliea	0		Vagococcus	0
	Desulfarculus	0.01		Niastella	0.01		Amorphus	0		Phaeocystidibacter	0
	Plesiocystis	0.01		Methyloparacoccus	0.01		Inhella	0		Rehaibacterium	0
	Methyloparacoccus	0.01		Iamia	0.01		Thermohalobacter	0		Defluviicoccus	0
	Flavitalea	0.01		Anaerovorax	0.01		Saccharofermentans	0		Cytophaga	0
	Pseudohaliea	0.01		Desulfatitalea	0.01		Meiothermus	0		Rivibacter	0
	Desulfomonile	0.01		Tahibacter	0.01		Tepidanaerobacter	0		Trichococcus	0
	Lactococcus	0.01		Desulfocarbo	0.01		Sedimentibacter	0		Azonexus	0
	Sorangium	0.01		Thermovirga	0.01		Amaricoccus	0		Thiohalophilus	0
	Oligotropha	0.01		Sulfurisoma	0.01		Halobacteriovorax	0		Rhizobium	0
	Acetoanaerobium	0.01		Klebsiella	0.01		Desulfobulbus	0		Fulvivirga	0
	Fluviimonas	0.01		Coprobacter	0.01		Methylosarcina	0		Kinneretia	0
	Candidatus Anammoxoglobus	0.01		Sporocytophaga	0.01		Desulfoconvexum	0		Ferritrophicum	0
	Succinispira	0.01		Deinobacterium	0.01		Thermochromatium	0		Aminobacter	0
	Georgfuchsia	0.01		Vulcaniibacterium	0.01		Mycoplana	0		Isobaculum	0
	Faecalibacterium	0.01		Arcticibacter	0.01		Thermodesulfobium	0		Petrimonas	0
	Thiopseudomonas	0.01		Candidatus Solibacter	0.01		Tepidiphilus	0		Acetoanaerobium	0
	Hydrogenophaga	0.01		Telmatocola	0.01		Ruminococcus	0		Paenirhodobacter	0
	Clostridium IV	0.01		Mangrovibacterium	0.01		Albidovulum	0		Nubsella	0
	Desulfovibrio	0.01		Aminobacter	0.01		Dendrosporobacter	0		Bacillus	0
	Albidovulum	0.01		Alicycliphilus	0		Bordetella	0		Cobetia	0
	Thermomarinilinea	0.01		Marmoricola	0		Rhodococcus	0		Proteocatella	0
	Arcticibacter	0.01		Leptospira	0		Hyalangium	0		Odoribacter	0
	Proteiniclasticum	0.01		Frigidibacter	0		Azonexus	0		Sphingosinicella	0
	Sulfurisoma	0.01		Thioalkalibacter	0		Rhodovibrio	0		Flavitalea	0
	Flavonifractor	0.01		Rhizorhapis	0		Luteolibacter	0		Rhizorhabdus	0
	Methylibium	0.01		Acetobacteroides	0		Paraprevotella	0		Pseudacidovorax	0
	Petrimonas	0.01		Xanthobacter	0		Thiolamprovum	0		Ramlibacter	0
	Gluconacetobacter	0.01		Thioalkalispira	0		Geobacter	0		Xylella	0
	Uruburuella	0.01		Desulfovermiculus	0		Phaeochromatium	0		Blastochloris	0
	Limnohabitans	0.01		Sphingosinicella	0		Roseivivax	0		Leptonema	0
	Azovibrio	0.01		Pelagibius	0		Tepidimicrobium	0		Shewanella	0
	Derxia	0.01		Sulfurivirga	0		Prolixibacter	0		Aerococcus	0
	Candidatus Pelagibacter	0.01		Fluviicola	0		Bacteriovorax	0		Chelativorans	0
	Desulfoprunum	0.01		Collinsella	0		Phytomonospora	0		Tardiphaga	0
	Thermomicrobium	0.01		Anaerobacterium	0		Caloramator	0		Azovibrio	0
	Parasphingopyxis	0.01		Truepera	0		Psychrobacter	0
	Rivicola	0.01		Alistipes	0		Fulvimonas	0
	Olsenella	0.01		Bifidobacterium	0		Anaerovorax	0
	Methylococcus	0.01		Leptothrix	0		Pedobacter	0
	Caulobacter	0.01		Elusimicrobium	0		Methylomicrobium	0
	Chryseobacterium	0.01		Turicibacter	0		Desulfovirga	0
	Clostridium XlVa	0.01		Sporobacter	0		Methylophilus	0
	WPS-1_genera_incertae_sedis	0.01		Halonatronum	0		Sterolibacterium	0
	Pseudobacteriovorax	0.01		Macellibacteroides	0		Methylobacter	0
	Caenimonas	0.01		Thermosulfurimonas	0		Sandarakinorhabdus	0
	Christensenella	0.01		Acidothermus	0		Blastococcus	0
	Aquicella	0.01		Sphaerotilus	0		Desulfacinum	0
	Alkanindiges	0.01		Candidatus Anammoxoglobus	0		Aquabacter	0
	Rhizorhapis	0.01		Methylosinus	0		Sandaracinobacter	0
	Anaerorhabdus	0.01		Enterococcus	0		Kallotenue	0
	Brevundimonas	0.01		Rivicola	0		Oscillibacter	0
	Thioprofundum	0.01		Desulfarculus	0		Pseudonocardia	0
	Sphaerobacter	0		Lachnospiracea_incertae_sedis	0		Lawsonia	0
	Phyllobacterium	0		Ramlibacter	0		Oleiagrimonas	0
	Larkinella	0		Prolixibacter	0		Orientia	0
	Lactivibrio	0		Acidaminobacter	0		Kineosporia	0
	Solitalea	0		Gp22	0		Pontibaca	0
	Coprococcus	0		Chitinimonas	0		Iamia	0
	Aminomonas	0		Sandarakinorhabdus	0		Dietzia	0
	Chiayiivirga	0		Kallotenue	0		Methylococcus	0
	Caldisericum	0		Butyrivibrio	0		Thermovirga	0
	Parasegetibacter	0		Thiohalomonas	0		Lactobacillus	0
	Dialister	0		Porphyrobacter	0		Skermanella	0
	Paucibacter	0		Dorea	0		Cupriavidus	0
	Vulgatibacter	0		Saccharicrinis	0		Caenimonas	0
	Leptonema	0		Anaerobacter	0		Hartmannibacter	0
	Enhygromyxa	0		Enhydrobacter	0		Corallococcus	0
	Elstera	0		Rhodopila	0		Albimonas	0
	Eubacterium	0		Knoellia	0		Staphylococcus	0
	Azoarcus	0		Treponema	0		Nitrolancea	0
	Paraherbaspirillum	0		Alloscardovia	0		Methylonatrum	0
	Salinirepens	0		Delftia	0		Pyrinomonas	0
	Treponema	0		Abiotrophia	0		Hydrogenispora	0
	Acetobacteroides	0		Oceanibaculum	0		Methylobrevis	0
	Euzebya	0		Mitsuaria	0		Thiopseudomonas	0
	Garciella	0		Meiothermus	0		Ferritrophicum	0
	Mycoplana	0		Kandleria	0		Aureivirga	0
	Halochromatium	0		Roseiflexus	0		Leptothrix	0
	Catenibacterium	0		Fodinicurvata	0		Zoogloea	0
	Pelomonas	0		Variovorax	0		Bacteroides	0
	Melittangium	0		Quatrionicoccus	0		Niastella	0
	Anaerofustis	0		Plesiocystis	0		Meniscus	0
	Desulfovermiculus	0		Pyxidicoccus	0		Exilispira	0
	Aspromonas	0		Bacteriovorax	0		Lacihabitans	0
	Ferriphaselus	0		Corallococcus	0		Defluviitoga	0
	Actinomyces	0		Propionicimonas	0		Geminicoccus	0
	Acidaminococcus	0		Aureivirga	0		Lewinella	0
	Psychrobacter	0		Propionibacterium	0		Candidatus Brocadia	0
	Sphaerotilus	0		Chlamydophila	0		Acidisoma	0
	Alicycliphilus	0		Croceicoccus	0		Dongia	0
	Klebsiella	0		Parasegetibacter	0		Clostridium IV	0
	Enterococcus	0		Nitritalea	0		Prosthecomicrobium	0
	Bacteriovorax	0		Chromatocurvus	0		Sulfuricella	0
	Amaricoccus	0		Cucumibacter	0		Rhizorhapis	0
	Cucumibacter	0		Helicobacter	0		Wandonia	0
	Pleomorphomonas	0		Marinobacterium	0		Roseiflexus	0
	Porphyrobacter	0		Alkanindiges	0		Methylohalomonas	0
	Desulfoconvexum	0		Bosea	0		Fimbriimonas	0
	Streptobacillus	0		Methanolinea	0		Cryobacterium	0
	Heliimonas	0		Ornithobacterium	0		Perlucidibaca	0
	Uliginosibacterium	0		Thioalkalivibrio	0		Nevskia	0
	Altererythrobacter	0		SR1_genera_incertae_sedis	0		Megamonas	0
	Anaerofilum	0		Sterolibacterium	0		Curvibacter	0
	Fimbriimonas	0		Owenweeksia	0		Algiphilus	0
	Parvibaculum	0		Oscillibacter	0		Nubsella	0
	Sandarakinorhabdus	0		Pelolinea	0		Sulfurisoma	0
	Faucicola	0		Catabacter	0		Limnobacter	0
	Crocinitomix	0		Nitrobacter	0		Thioalkalibacter	0
	Rhizobium	0		Naumannella	0		Rheinheimera	0
	Falsirhodobacter	0		Blastomonas	0		Atribacteria_genera_incertae_sedis	0
	Coraliomargarita	0		Magnetovibrio	0		Sphingosinicella	0
	Wandonia	0		Methylococcus	0		Roseiarcus	0
	Flavisolibacter	0		Desulfovibrio	0		Hoeflea	0
	Senegalimassilia	0		Roseateles	0		Coprothermobacter	0
	Blastomonas	0		Vibrio	0		Bifidobacterium	0
	Polynucleobacter	0		Pandoraea	0		Alishewanella	0
	Brucella	0					Sporanaerobacter	0
	Thermodesulforhabdus	0					Propionivibrio	0
	Propionigenium	0					Alistipes	0
	Rhodovibrio	0
	Pectinatus	0
	Luteolibacter	0
	Hyalangium	0
	Gordonibacter	0
	Chungangia	0
	Gynuella	0
	Candidatus Brocadia	0
	Erythromicrobium	0
	Thermovirga	0
	Enhydrobacter	0
	Kluyvera	0
	Elusimicrobium	0
	Anaerosphaera	0
	Eggerthella	0
	Ornithinibacter	0
	Giesbergeria	0
	Alkaliflexus	0
	Holophaga	0
	Corynebacterium	0
	Aquincola	0
	Colwellia	0
	Desulfurivibrio	0
	Azomonas	0
	Butyricicoccus	0
	Acidisoma	0
	Mitsuaria	0
	Formivibrio	0
	Sporocytophaga	0
	Bacillus	0
	Reinekea	0
	Diaphorobacter	0
	Ralstonia	0
	Selenomonas	0
	Rivibacter	0
	Sporobacter	0
	Acetanaerobacterium	0
	Thermochromatium	0
	Actinotignum	0
	Vitreoscilla	0
	Hespellia	0
	Gaiella	0
	Leptospira	0
	Megamonas	0
	Pedobacter	0
	Stenotrophomonas	0
	Carboxylicivirga	0
	Pseudenhygromyxa	0
	Limnobacter	0
	Staphylococcus	0
	Fulvimonas	0
	Hydrotalea	0
	Tissierella	0
	Eionea	0
	Thalassomonas	0
	Chlamydophila	0
	Weissella	0
	Maricurvus	0
	Marinicauda	0
	Schwartzia	0
	Pelotomaculum	0
	Thalassotalea	0
	Anaerobacter	0
	Gilliamella	0
	Ornithobacterium	0
	Sinobacterium	0
	Rhodococcus	0
	Gallionella	0
	Anaerostipes	0
	Thermoanaerobaculum	0
	Ercella	0
	BRC1_genera_incertae_sedis	0
	Pelosinus	0
	Thiothrix	0
	Candidatus Koribacter	0
	Syntrophorhabdus	0
	Craurococcus	0
	Aminivibrio	0
	Saccharicrinis	0
	Veillonella	0
	Methanobrevibacter	0
	Tolumonas	0
	Insolitispirillum	0
	Melaminivora	0
	Paenirhodobacter	0
	Duganella	0
	Roseiarcus	0
	Halobacteriovorax	0
	Parvibacter	0
	Methanosphaerula	0
	Tepidiphilus	0
	Acidisphaera	0
	Anaerobacterium	0
	Telmatocola	0
	Melissococcus	0
	Neisseria	0
	Vibrio	0
	Fastidiosipila	0
	Bilophila	0
	Roseovarius	0
	Metallibacterium	0
	Pseudoduganella	0
	Beggiatoa	0
	Anaerosporobacter	0
	Proteiniphilum	0
	Methylocella	0
	Sulfurovum	0
	Eisenbergiella	0
	Diplorickettsia	0
	Marinobacter	0
	Methylophilus	0
	Tepidimicrobium	0
	Methylorosula	0
	Pseudorhodoferax	0
	Pilibacter	0
	Amphritea	0
	Holdemania	0
	Dongia	0
	Lutimonas	0
	Rhizorhabdus	0
	Serinibacter	0
	Trabulsiella	0
	Tepidamorphus	0
	Dehalospirillum	0
	Filimonas	0
	Thermotunica	0
	Alloprevotella	0
	Facklamia	0
	Cnuella	0
	Croceicoccus	0
	Leeia	0
	Cronobacter	0
	Intestinibacter	0
	Mangroviflexus	0
	Thioalbus	0
	Barnesiella	0
	Propionibacterium	0
	Natronocella	0
	Alteromonas	0
	Acidothermus	0
	Draconibacterium	0
	Nisaea	0
	Geobacillus	0
	Clostridium XVIII	0
	Gordonia	0
	Anaerotruncus	0
	Congregibacter	0
	Tetrasphaera	0
	Microbacterium	0
	Tepidicella	0
	Ectothiorhodosinus	0
	Mitsuokella	0
	Serratia	0
	Deferrisoma	0
	Methylobacillus	0
	Lacihabitans	0
	Tahibacter	0
	Quatrionicoccus	0
	Rubricoccus	0
	Psychrobium	0
	Granulicatella	0
	Guggenheimella	0
	Acidicaldus	0
	Ethanoligenens	0
	Psychrilyobacter	0
	Naumannella	0
	Sphingosinicella	0
	Dorea	0
	Alterococcus	0
	Frigidibacter	0
	Xylophilus	0
	Nitrolancea	0
	Leucobacter	0
	Holdemanella	0
	Escherichia/Shigella	0
	Candidatus Solibacter	0
	Poseidonocella	0
	Thermoflexus	0
	Pyxidicoccus	0
	Cruoricaptor	0
